# Supplementary material
Source: MDPI journal article supplement (https://www.mdpi.com/1999-4907/8/1/3)
Supplement: s1 [file s1]

Supplementary Materials: Adaptive Variation and Introgression of a *CONSTANS*-Like Gene in North American Red Oaks

Jennifer F. Lind-Riehl and Oliver Gailing

**Table S1.** Location of collection sites for 16 *Quercus* spp. Populations.

| **Associated Area Number in Figure 1** | **Population** | **Acronym** | **Species** | **Sample Size** | **Latitude** | **Longitude** |
| --- | --- | --- | --- | --- | --- | --- |
| **Parapatric population pairs** | | | | | | |
| 1 | Chequamegon-Nicolet National Forest, Wisconsin | C-QE | *Q. ellipsoidalis* | 40 | 46°44′ N | 91°04' W |
| 1 | Chequamegon-Nicolet National Forest, Wisconsin | C-QR | *Q. rubra* | 40 | 46°42′ N | 91°02' W |
| 2 | Nicolet National Forest, Wisconsin | N-QE | *Q. ellipsoidalis* | 39 | 45°19′ N | 88°19′ W |
| 2 | Nicolet National Forest, Wisconsin | N-QR | *Q. rubra* | 40 | 45°20′ N | 88°23′ W |
| 3 | Ford Research Forest and Baraga Plains area, Michigan | FC-A | *Q. rubra* | 40 | 46°39′ N | 88°30′ W |
| 3 | Ford Research Forest and Baraga Plains area, Michigan | FC-C | *Q. ellipsoidalis* | 40 | 46°39′ N | 88°35′ W |
| 3 | Ford Research Forest and Baraga Plains area, Michigan | FC-B | *Q. rubra* | 40 | 46°40′ N | 88°31′ W |
| 3 | Ford Research Forest and Baraga Plains area, Michigan | FC-E | *Q. ellipsoidalis* | 40 | 46°39′ N | 88°33' W |
| 4 | Hoosier Prairie State Nature Preserve, Lake Co., Indiana | HPNSP-IN-LC | *Q. ellipsoidalis*  *Q. velutina* | 29 | 41°31′ N | 87°26′ W |
| 4 | Liverpool Savanna, Lake Co., Indiana | LS-IN-LC | *Q. ellipsoidalis*  *Q. velutina* | 12 | 41°33′ N | 87°17′ W |
| 5 | Riverview, Newaygo Co., Michigan | MI-NC | *Q. ellipsoidalis*  *Q. velutina* | 31 | 43°26' N | 85°37′ W |
| 6 | AuSable State Forest, vicinity of oil fields, Ogemaw Co., Michigan | MI-OGC | *Q. ellipsoidalis*  *Q. velutina* | 31 | 44°26′ N | 84°12′ W |
| 7 | Reforestation Camp, Brown Co., Wisconsin | WI-BC | *Q. ellipsoidalis*  *Q. velutina* | 24 | 44°40′ N | 88°05′ W |
| 8 | Wolf Road Prairie Nature Preserve, Cook Co., Illinois | WRPNP-IL-CC | *Q. ellipsoidalis*  *Q. velutina* | 21 | 41°50′ N | 87°54′ W |
| 9 | Rim Rock Recreation Area & Pounds Hollow Recreation Area, Shawnee National Forest, Gallatin Co., Illinois | SNF-IL-GC | *Q. coccinea* | 20 | 37°36′ N | 88°16′ W |
| **Sympatric population** | | | | | | |
| 10 | Pleasant Valley Conservancy, Dane County, Wisconsin | PV-DC | *Q. rubra*  *Q. ellipsoidalis*  *Q. velutina* | 71 | 43°06′ N | 89°48′ W |

**Table S2.** Microsatellite marker characteristics.

| **Microsatellite** | **Repeat Motif** | **Forward Primer Sequence (5′-3′)** | **Reverse Primer Sequence (5′-3′)** | **Ta (°C)** | **Size Range  (in Base Pairs)** | **Species** | **Linkage Group d** | **Functional Annotation c** |
| --- | --- | --- | --- | --- | --- | --- | --- | --- |
| 1P10 a | (TG)12GCC(TG)3 | 6FAM-ATTTCTGATGCAGGGTGTCG | TAGGCCAAGGACCAGAGACC | 62 | 237–265 | *Q. rubra* | - | - |
| 2P24 a | (CA)14 | VIC-GCAAGAGATCACACACAAACTAGC | CTTTGGGTTCACCAAACAGC | 62 | 136–172 | *Q. rubra* | - | - |
| 3A05 a | (CA)12(CT)2 | PET-AACGTGACCTCTCTCACAGC | AGTGCTGGAGTGCTCATGG | 62 | 138–162 | *Q. rubra* | - | - |
| 3D15 a | (CA)15 | NED-GGTGGTGGCAGATACACTGG | GACTCAGACAACCAACTTCAGG | 62 | 208–236 | *Q. rubra* | - | - |
| FIR004 b | (CT)18 | 6FAM-TCTCTCTCAGGGCAGCTTCT | AACCAAACTCAGATCCAGATTCA | 59 | 124–178 | *Q. robur* | 3 | ---NA--- |
| FIR013 b | (CAG)5 | 6FAM-CGGGGAGGTTGATGAGTATT | AACACTGTCACCCCCATAGC | 56 | 133–144 | *Q. robur* | 2 | constans-1 |
| GOT004 b | (TG)12 | 6FAM-GGGCATATTGATCGCTTAGG | TGAGCATTCATACATTCCATGAT | 59 | 264–294 | *Q. robur* | 7 | ---NA--- |
| GOT009 b | (TC)7 | 6FAM-CACCTCACTAAGCAACCTGTCA | TTTTGGAGGCGGAGATAATG | 56 | 225–249 | *Q. robur* | 12 | predicted protein |
| GOT021 b | (AT)13 | VIC-AGAAAGTTCCAGGGAAAGCA | CTTCGTCCCCAGTTGAATGT | 59 | 95–101 | *Q. robur* | 3 | histidine kinase 4-like |
| PIE040 b | (TTC)8 | NED-GTGAGAGAGAGAGAGACAAAGAAGAAAAA | AAATTCTCCGCCACATTGAG | 59 | 155–174 | *Q. robur* | 11 | basic leucine zipper transcription factor-like protein |
| PIE099 b | (TC)9 | VIC-GTAAAACGACGGCCAGTGTGGCTACCGACTACTACCACTTC | CGGTGGACCCAATATGTAAC | 56 | 179–209 | *Q. robur* | 8 | at1g05070 t7a14_6 |
| quru-GA-0C11 a | (GA)15 | VIC-ATACCCAGCTCCCATGACCA | TCCCCAAATTCAGGTAGTGT | 59 | 201–233 | *Q. rubra* | - | - |

a Simple sequence repeats (SSRs) [1]; b expressed sequence tag-simple sequence repeats (EST-SSRs) [2,3]; c Putative function determined through a BLASTx search following the method in [4]; d on *Q. robur* linkage map in either [2,5].

**Table S3.** Characteristics of samples used in the sequencing effort.

| **Population** | **Acronym** | **Species** | **Samples Sequenced** | **FIR013 Genotype** |
| --- | --- | --- | --- | --- |
| Montgomery County, Alabama | AL-MC | *Q. rubra* | 115 | 141/141 |
| Chequamegon-Nicolet National Forest, Wisconsin | C-QE | *Q. ellipsoidalis*  *Q. ellipsoidalis* | CX35  CX23 | 138/138  144/144 |
| Chequamegon-Nicolet National Forest, Wisconsin | C-QR | *Q. rubra* | CM40 | 141/141 |
| Ford Research Forest and Baraga Plains area | FC-A | *Q. rubra* | F124 | 141/141 |
| Ford Research Forest and Baraga Plains area | FC-B | *Q. rubra*  *Q. rubra* | 28  F149 | 138/138  141/141 |
| Ford Research Forest and Baraga Plains area | FC-C | *Q. ellipsoidalis*  *Q. ellipsoidalis*  *Q. ellipsoidalis* | F002  F010  F001 | 138/138  141/141  141/141 |
| Ford Research Forest and Baraga Plains area | FC-E | *Q. ellipsoidalis* | F052 | 138/138 |
| Hoosier Prairie State Nature Preserve, Lake Co., Indiana | HPNSP-IN-LC | *Q. velutina* | 3086 | 138/138 |
| Liverpool Savanna, Lake Co., Indiana | LS-IN-LC | *Q. velutina*  *Q. velutina*  *Q. velutina*  *Q. velutina* | 3052  3067  3049  3048 | 138/138  138/138  138/138  141/141 |
| Riverview, Newaygo Co., Michigan | MI-NC | *Q. ellipsoidalis*  *Q. ellipsoidalis*  *Q. velutina*  *Q. velutina*  *Q. velutina*  *Q. velutina*  *Q. velutina*  *Q. velutina*  *Q. velutina*  *Q. velutina* | 3090  2898  2897  2909  2910  2911  2915  2916  2917  2543 | 138/138  138/138  138/138  138/138  138/138  138/138  138/138  138/138  138/138  138/138 |
| AuSable State Forest, vicinity of oil fields, Ogemaw Co., Michigan | MI-OGC | *Q. velutina* | JS720 | 138/138 |
| Nicolet National Forest, Wisconsin | N-QE | *Q. ellipsoidalis* | NX20 | 138/138 |
| Nicolet National Forest, Wisconsin | N-QR | *Q. rubra* | NM22 | 141/141 |
| Pleasant Valley Conservancy, Dane County, Wisconsin | PV-DC | *Q. ellipsoidalis*  *Q. ellipsoidalis*  *Q. velutina*  *Q. velutina*  *Q. velutina*  *Q. velutina*  *Q. rubra* | H002  H003  B004  B005  B022  B023  R002 | 138/138  138/138  138/138  138/138  138/138  138/138  141/141 |
| Pleasant Valley Conservancy, Dane County, Wisconsin | PV-DC | *Q. rubra* | R024 | 141/141 |
| Rim Rock Recreation Area & Pounds Hollow Recreation Area, Shawnee National Forest, Gallatin Co., Illinois | SNF-IL-GC | *Q. coccinea*  *Q. coccinea*  *Q. coccinea*  *Q. coccinea*  *Q. coccinea*  *Q. coccinea*  *Q. coccinea*  *Q. coccinea* | 2583  2584  2585  2587  2588  2592  2593  2594 | 138/138  138/138  138/138  138/138  138/138  138/138  138/138  138/138 |
| Henderson County, Tennessee | TN-HC | *Q. rubra* | 116 | 141/141 |

**Table S4.** Relative frequency of a single nucleotide polymorphism in the coding region of a *COL* gene (Position 9, see Figure 2).

| **Genotype** | ***Q. coccinea*** | ***Q. ellipsoidalis*** | ***Q. velutina*** | ***Q. rubra*** |
| --- | --- | --- | --- | --- |
| CC | 0.375 | 0.364 | 0.389 | 0.889 |
| CG | 0.500 | 0.182 | 0.444 | 0.000 |
| GG | 0.125 | 0.455 | 0.167 | 0.111 |

**Table S5.** Genetic variation parameters by population and species across the 12 microsatellite markers.

| **Population** | **Species** | **Na** | **Ho** | **He** | **F** |
| --- | --- | --- | --- | --- | --- |
| **Parapatric population pairs** | | | | | |
| C-QE | *Q. ellipsoidalis* | 9 | 0.578 | 0.707 | 0.176 |
| C-QR | *Q. rubra* | 9 | 0.667 | 0.724 | 0.082 |
| N-QE | *Q. ellipsoidalis* | 10 | 0.610 | 0.733 | 0.199 |
| N-QR | *Q. rubra* | 9 | 0.646 | 0.699 | 0.047 |
| FC-A | *Q. rubra* | 8 | 0.581 | 0.711 | 0.134 |
| FC-C | *Q. ellipsoidalis* | 8 | 0.602 | 0.680 | 0.103 |
| FC-B | *Q. rubra* | 9 | 0.585 | 0.701 | 0.158 |
| FC-E | *Q. ellipsoidalis* | 8 | 0.514 | 0.663 | 0.171 |
| HPNSP-IN-LC | *Q. ellipsoidalis*, *Q. velutina* | 9 | 0.634 | 0.704 | 0.062 |
| LS-IN-LC | *Q. ellipsoidalis*, *Q. velutina* | 6 | 0.698 | 0.757 | 0.024 |
| MI-NC | *Q. ellipsoidalis*, *Q. velutina* | 9 | 0.700 | 0.741 | 0.010 |
| MI-OGC | *Q. ellipsoidalis*, *Q. velutina* | 8 | 0.699 | 0.751 | 0.008 |
| WI-BC | *Q. ellipsoidalis*, *Q. velutina* | 6 | 0.583 | 0.709 | 0.180 |
| WRPNP-IL-CC | *Q. ellipsoidalis*, *Q. velutina* | 8 | 0.682 | 0.735 | 0.011 |
| SNF-IL-GC | *Q. coccinea* | 7 | 0.633 | 0.639 | −0.043 |
| **Sympatric population** | | | | | |
| PV-DC | *Q. rubra*  *Q. ellipsoidalis*  *Q. velutina* | 10 | 0.652 | 0.767 | 0.128 |
| **Species** | | | | | |
| QR | *Q. rubra* | 14 | 0.621 | 0.751 | 0.187 |
| QE | *Q. ellipsoidalis* | 15 | 0.596 | 0.715 | 0.154 |
| QV | *Q. velutina* | 13 | 0.676 | 0.771 | 0.106 |
| QC | *Q. coccinea* | 7 | 0.633 | 0.639 | −0.043 |

**Table S6.** Genetic variation parameters by population and species across 11 non-outlier microsatellite markers.

| **Population** | **Species** | **Na** | **Ho** | **He** | **F** |
| --- | --- | --- | --- | --- | --- |
| **Parapatric population** | | | | | |
| C-QE | *Q. ellipsoidalis* | 10 | 0.610 | 0.725 | 0.139 |
| C-QR | *Q. rubra* | 10 | 0.721 | 0.762 | 0.018 |
| N-QE | *Q. ellipsoidalis* | 11 | 0.639 | 0.761 | 0.190 |
| N-QR | *Q. rubra* | 10 | 0.702 | 0.759 | 0.053 |
| FC-A | *Q. rubra* | 9 | 0.626 | 0.768 | 0.149 |
| FC-C | *Q. ellipsoidalis* | 9 | 0.639 | 0.715 | 0.082 |
| FC-B | *Q. rubra* | 10 | 0.634 | 0.756 | 0.129 |
| FC-E | *Q. ellipsoidalis* | 9 | 0.543 | 0.707 | 0.195 |
| HPNSP-IN-LC | *Q. ellipsoidalis*, *Q. velutina* | 10 | 0.664 | 0.740 | 0.068 |
| LS-IN-LC | *Q. ellipsoidalis*, *Q. velutina* | 6 | 0.727 | 0.781 | 0.009 |
| MI-NC | *Q. ellipsoidalis*, *Q. velutina* | 10 | 0.727 | 0.777 | 0.030 |
| MI-OGC | *Q. ellipsoidalis*, *Q. velutina* | 8 | 0.734 | 0.794 | 0.021 |
| WI-BC | *Q. ellipsoidalis*, *Q. velutina* | 6 | 0.636 | 0.752 | 0.098 |
| WRPNP-IL-CC | *Q. ellipsoidalis*, *Q. velutina* | 8 | 0.710 | 0.773 | 0.033 |
| SNF-IL-GC | *Q. coccinea* | 8 | 0.650 | 0.664 | −0.025 |
| **Sympatric population** | | | | | |
| PV-DC | *Q. rubra*  *Q. ellipsoidalis*  *Q. velutina* | 11 | 0.682 | 0.785 | 0.100 |
| **Species** | | | | | |
| QR | *Q. rubra* | 14 | 0.793 | 0.799 | 0.100 |
| QE | *Q. ellipsoidalis* | 16 | 0.747 | 0.749 | 0.141 |
| QV | *Q. velutina* | 15 | 0.792 | 0.794 | 0.142 |
| QC | *Q. coccinea* | 8 | 0.650 | 0.664 | −0.025 |

**Table S7.** Pairwise FST value by species across all 12 microsatellite markers using GeneAlEx [6].

|  | ***Q. ellipsoidalis*** | ***Q. rubra*** | ***Q. velutina*** |
| --- | --- | --- | --- |
| ***Q. ellipsoidalis*** | 0 | - | - |
| ***Q. rubra*** | 0.058 *** | 0 | - |
| ***Q. velutina*** | 0.019 *** | 0.041 *** | 0 |

* significant at α = 0.05; ** significant at α = 0.01; *** significant at α = 0.001.

**Table S8.** FST-based outlier screening results across the 12 microsatellite markers using LOSITAN [7].

|  | ***Q. ellipsoidalis*** | ***Q. rubra*** | ***Q. velutina*** |
| --- | --- | --- | --- |
| ***Q. ellipsoidalis*** | 0 | - | - |
| ***Q. rubra*** | 0.593 *** | 0 | - |
| ***Q. velutina*** | 0.030 *** | 0.444 *** | 0 |

* LOSITAN [7] uses more stringent parameters (see [8]) to calculate FST values than GeneAlEx [6], so estimated FST values are more conservative; *** significant at α = 0.001 and with 10% false discovery rate (FDR) applied.

**Figure S1.** Relative genotypic frequencies in pure species of *Q. rubra*, *Q. ellipsoidalis* and *Q. velutina* in parapatric populations and one sympatric population of *Q. rubra*, *Q. ellipsoidalis* and *Q. velutina* (starred) at the FIR013 locus.


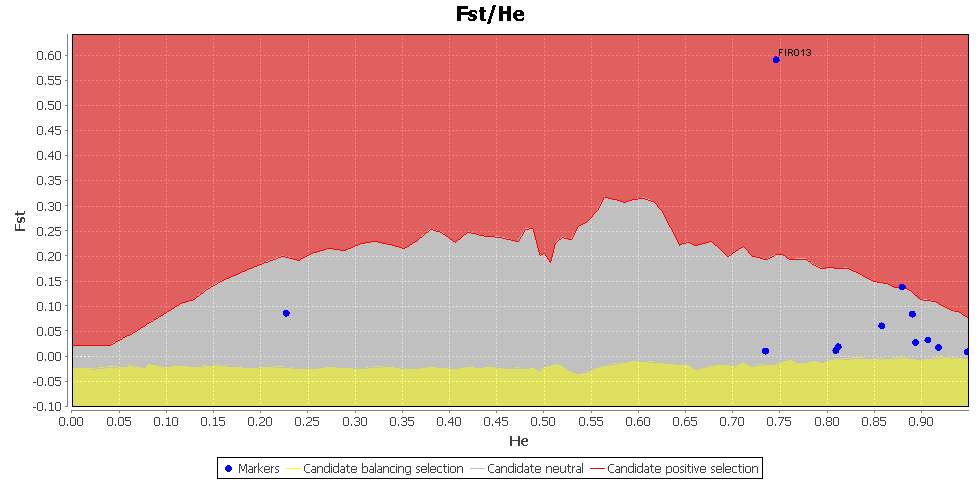


**Figure S2.** Outlier loci analysis of 12 markers between *Q. rubra* and *Q. ellipsoidalis* as calculated by LOSITAN [7] with a 99% confidence interval; FIR013 found to be an outlier even after the application of 10% FDR.


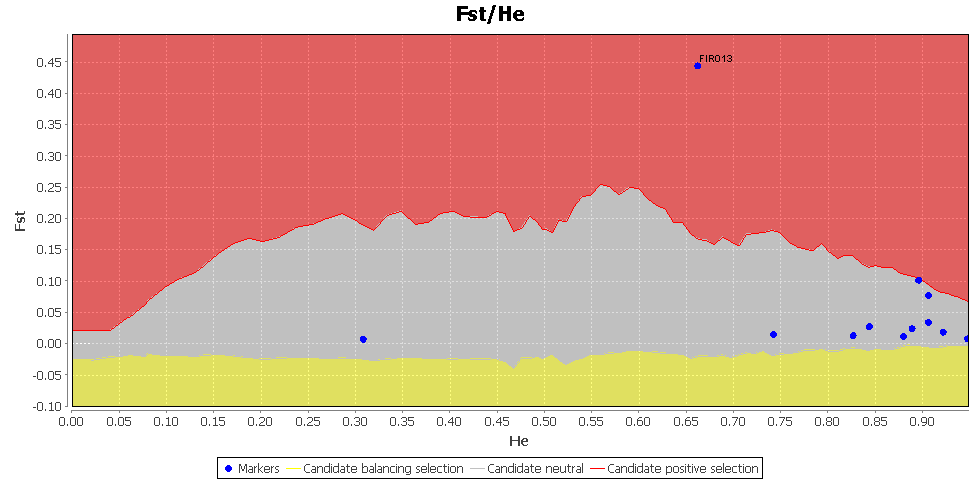


**Figure S3.** Outlier loci analysis of 12 markers between *Q. rubra* and *Q. velutina* as calculated in LOSITAN [7] with a 99% confidence interval; 3A05 found not to be an outlier after the application of 10% FDR.


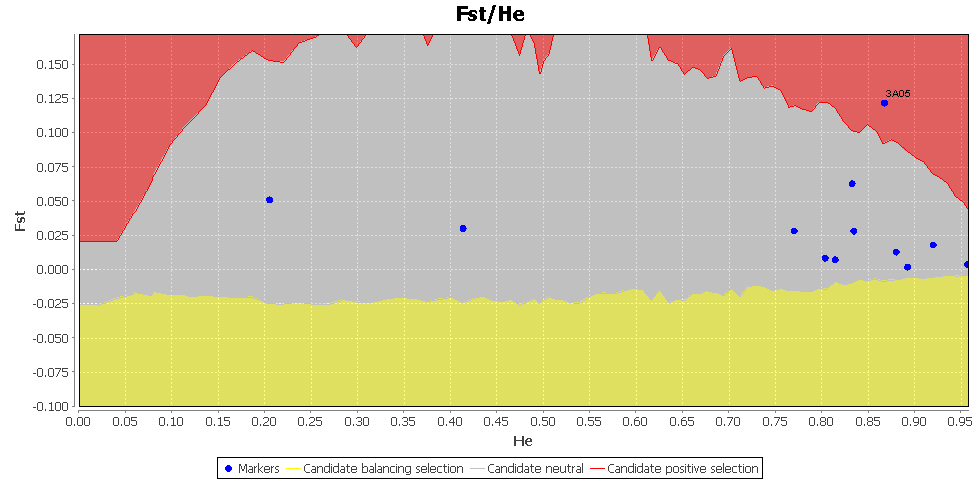


**Figure S4.** Outlier loci analysis of 12 markers between *Q. velutina* and *Q. ellipsoidalis* as calculated in LOSITAN [7] with a 99% confidence interval; 3A05 found not to be an outlier after the application of 10% FDR.

References

1. Aldrich, P.R.; Michler, C.H.; Sun, W.L.; Romero-Severson, J. Microsatellite markers for northern red oak (Fagaceae: *Quercus rubra*). *Mol Ecol Notes*. **2002**, *2*, 472–474.
2. Durand, J.; Bodenes, C.; Chancerel, E.; Frigerio, J.-M.; Vendramin, G.; Sebastiani, F.; Buonamici, A.; Gailing, O.; Koelewijn, H.-P.; Villani, F.; et al. A fast and cost-effective approach to develop and map EST-SSR markers: Oak as a case study. *BMC Genom*. **2010**, *11*, 570.
3. Sullivan, A.; Lind, J.F.; McCleary, T.; Romero-Severson, J.; Gailing, O. Development and characterization of genomic and gene-based microsatellite markers in North American red oak species. *Plant Mol Biol Rep*. **2012**, *31*, 231–239.
4. Luro, F.; Costantino, G.; Terol, J.; Argout, X.; Allario, T.; Wincker, P.; Talon, M.; Ollitrault, P.; Morillon, R. Transferability of the EST-SSRs developed on Nules clementine (*Citrus clementina* Hort ex Tan) to other Citrus species and their effectiveness for genetic mapping. *BMC Genom*. **2008**, *9*, 287.
5. Bodénès, C.; Chancerel, E.; Gailing, O.; Vendramin, G.; Bagnoli, F.; Durand, J.; Goicoechea, P.; Soliani, C.; Villani, F.; Mattioni, C.; et al. Comparative mapping in the Fagaceae and beyond with EST-SSRs. *BMC Plant Biol*. **2012**, *12*, 153.
6. Peakall, R.O.D.; Smouse, P.E. GeneAlEx 6: Genetic analysis in Excel. Population genetic software for teaching and research. *Mol. Ecol. Notes* **2006**, *6*, 288–295.
7. Antao, T.; Lopes, A.; Lopes, R.; Beja-Pereira, A.; Luikart, G. LOSITAN: A workbench to detect molecular adaptation based on a Fst-outlier method. *BMC Bioinform.* **2008**, *9*, 323.
8. Lind-Riehl, J.F.; Sullivan, A.R.; Gailing, O. Evidence for selection on a CONSTANS-like gene between two red oak species. *Ann. Bot. Lond.* **2014**, *113*, 967–975.

© 2017 by the authors. Submitted for possible open access publication under the
terms and conditions of the Creative Commons Attribution (CC-BY) license (http://creativecommons.org/licenses/by/4.0/).
